# Supplementary material
Source: PubMed Central journal article supplement (PMC4369443)
Supplement: NIHMS664616-supplement-supplement_1.pdf [file NIHMS664616-supplement-supplement_1.pdf]

**Supplemental Table S1. Oxidative Balance Score (OBS) Weights**

| OBS Components                        | Weights                      |        |       |        |             |
|---------------------------------------|------------------------------|--------|-------|--------|-------------|
|                                       | F <sub>2</sub> -isoprostanes |        | FOP   |        | Lit. Review |
|                                       | Male                         | Female | Male  | Female | Both sexes  |
| 1. PUFA intake                        | 1.00*                        | 1.00*  | 1.23  | 1.24   | 1.00*       |
| 2. Total iron intake                  | 1.00*                        | 1.00*  | 1.00* | 1.00*  | 1.40        |
| 3. Total vitamin C intake             | 1.81                         | 1.48   | 1.12  | 1.00*  | 1.00*       |
| 4. Total lycopene level               | 1.17                         | 1.35   | 1.00* | 1.00*  | 1.22        |
| 5. Total $\alpha$ -carotene level     | 1.43                         | 1.22   | 1.00* | 1.00*  | 1.32        |
| 6. Total $\beta$ -carotene level      | 1.45                         | 1.31   | 1.00* | 1.00*  | 1.00*       |
| 7. Total lutein level                 | 1.61                         | 1.73   | 1.00* | 1.00*  | 1.20        |
| 8. Total $\beta$ -cryptoxanthin level | 1.69                         | 1.38   | 1.16  | 1.11   | 1.22        |
| 9. Total $\alpha$ -tocopherol level   | 1.79                         | 1.30   | 1.00* | 1.00*  | 1.00*       |
| 10. Selenium level                    | 1.32                         | 2.18   | 1.12  | 1.61   | 1.11        |
| 11. Smoking history                   | 1.74                         | 1.43   | 1.60  | 1.80   | 1.83        |
| 12. Regular aspirin use               | 1.28                         | 1.20   | 1.00* | 1.00*  | 1.06        |
| 13. Regular NSAID use                 | 1.06                         | 1.04   | 1.00* | 1.00*  | 1.00*       |
| 14. Alcohol consumption               | 1.07                         | 1.00*  | 1.35  | 1.23   | 1.30        |

Abbreviations: OBS=Oxidative Balance Score PUFA=Polyunsaturated fatty acid; NSAID=Non-steroidal anti-inflammatory drug; FOP=fluorescent oxidation products; Lit.=literature

\*Default weight of 1.0 was assigned because risks were in the opposite directions of what we believed to be anti- (RR<1) or pro-oxidants (RR>1)
